# Supplementary material for: Similar Rates of Deleterious Copy Number Variants in Early-Onset Psychosis and Autism Spectrum Disorder
Source: Atypon-hosted journal article supplement (doi:10.1176/appi.ajp.21111175), 2022-08-24
Supplement: appi.ajp.21111175.ds001.pdf [file appi.ajp.21111175.ds001.pdf]

Data supplement for Brownstein et al., Rate of Deleterious Copy Number Variants Similar in Early Onset Psychosis and Autism Spectrum Disorders: Implications for Clinical Practice. *Am J Psychiatry* (doi: 10.1176/appi.ajp.21111175)

## **CONTENTS**

TABLE S1. Neurodevelopmental or neuropsychiatric-associated loci and genes investigated

TABLE S2. List of the recurrent neurodevelopmental or neuropsychiatric-associated CNVs identified in the EOP sample

TABLE S3. Enrichment of individual neurodevelopmental or neuropsychiatric-associated CNVs in EOP relative to ASD and controls

TABLE S4. Phenotypes of 1q21 duplication patients in comparison to Rosenfeld, et al. 20125

**TABLE S1. Neurodevelopmental or neuropsychiatric-associated loci and genes investigated**

| Locus                       | CHR | START     | STOP      | TYPE | References for the association with NPD |
|-----------------------------|-----|-----------|-----------|------|-----------------------------------------|
| <b>1p36</b>                 | 1   | 1         | 2500000   | DEL  | Coe et al. 2014                         |
|                             |     |           |           | DUP  | Coe et al. 2014                         |
| <b>1q21.1 TAR</b>           | 1   | 145394955 | 145807817 | DEL  | Coe et al. 2014                         |
|                             |     |           |           | DUP  | Coe et al. 2014                         |
| <b>1q21.1 distal+TAR</b>    | 1   | 145394955 | 147394444 | DEL  | Coe et al. 2014                         |
|                             |     |           |           | DUP  | Coe et al. 2014                         |
| <b>1q21.1 distal</b>        | 1   | 146527987 | 147394444 | DEL  | Sanders et al. 2019                     |
|                             |     |           |           | DUP  | Sanders et al. 2019                     |
| <b><i>NRXN1</i></b>         | 2   | 50145643  | 51259674  | Gene | Satterstrom et al. 2020                 |
| <b>2q11.2</b>               | 2   | 96742409  | 97677516  | DEL  | Coe et al. 2014                         |
|                             |     |           |           | DUP  | Coe et al. 2014                         |
| <b>2q13</b>                 | 2   | 111394040 | 112012649 | DEL  | Coe et al. 2014                         |
|                             |     |           |           | DUP  | Coe et al. 2014                         |
| <b>2q21.1</b>               | 2   | 131481308 | 131930677 | DEL  | Coe et al. 2014                         |
|                             |     |           |           | DUP  | Coe et al. 2014                         |
| <b>2q37</b>                 | 2   | 239716679 | 243199373 | DEL  | Coe et al. 2014                         |
|                             |     |           |           | DUP  | Coe et al. 2014                         |
| <b>3q29</b>                 | 3   | 195720167 | 197354826 | DEL  | Sanders et al. 2019                     |
|                             |     |           |           | DUP  | Coe et al. 2014                         |
| <b>4p16.3</b>               | 4   | 1552030   | 2091303   | DEL  | Coe et al. 2014                         |
|                             |     |           |           | DUP  | Coe et al. 2014                         |
| <b>5q35</b>                 | 5   | 175720924 | 177052594 | DEL  | Coe et al. 2014                         |
|                             |     |           |           | DUP  | Coe et al. 2014                         |
| <b><i>SIMI</i></b>          | 6   | 100836750 | 100911811 | Gene | Coe et al. 2014                         |
| <b>7q11.23 WBS</b>          | 7   | 72744915  | 74142892  | DEL  | Sanders et al. 2019                     |
|                             |     |           |           | DUP  | Sanders et al. 2019                     |
| <b>7q11.23 distal</b>       | 7   | 75138294  | 76064412  | DEL  | Coe et al. 2014                         |
|                             |     |           |           | DUP  | Coe et al. 2014                         |
| <b>8p23.1</b>               | 8   | 8098990   | 11872558  | DEL  | Coe et al. 2014                         |
|                             |     |           |           | DUP  | Coe et al. 2014                         |
| <b>9q34</b>                 | 9   | 140513444 | 140730578 | DEL  | Coe et al. 2014                         |
|                             |     |           |           | DUP  | Coe et al. 2014                         |
| <b>10q11.21q11.23</b>       | 10  | 49390199  | 51058796  | DEL  | Coe et al. 2014                         |
|                             |     |           |           | DUP  | Coe et al. 2014                         |
| <b>10q22q23</b>             | 10  | 82045472  | 88931651  | DEL  | Coe et al. 2014                         |
|                             |     |           |           | DUP  | Coe et al. 2014                         |
| <b>11p11.2</b>              | 11  | 43940000  | 46020000  | DEL  | Coe et al. 2014                         |
|                             |     |           |           | DUP  | Coe et al. 2014                         |
| <b><i>CRYL1</i></b>         | 13  | 20977806  | 21100012  | Gene | Coe et al. 2014                         |
| <b>13q12.12</b>             | 13  | 23555358  | 24884622  | DEL  | Coe et al. 2014                         |
|                             |     |           |           | DUP  | Coe et al. 2014                         |
| <b>15q11.2</b>              | 15  | 22805313  | 23094530  | DEL  | Sanders et al. 2019                     |
|                             |     |           |           | DEL  | Sanders et al. 2019                     |
| <b>15q11.2q12</b>           | 15  | 22805313  | 28390339  | DUP  | Sanders et al. 2019                     |
|                             |     |           |           | DEL  | Stefansson et al. 2014                  |
| <b>15q13.1q13.2 BP3-BP4</b> | 15  | 29161368  | 30375967  | DUP  | Stefansson et al. 2014                  |
|                             |     |           |           | DEL  | Coe et al. 2014                         |
| <b>15q13.1q13.3 BP3-BP5</b> | 15  | 29161368  | 32462776  | DUP  | Coe et al. 2014                         |
|                             |     |           |           | DEL  | Sanders et al. 2019                     |
| <b>15q13.3 BP4-BP5</b>      | 15  | 31080645  | 32462776  | DUP  | Sanders et al. 2019                     |
|                             |     |           |           | DEL  | Coe et al. 2014                         |
| <b>15q24</b>                | 15  | 72900171  | 78151253  | DUP  | Coe et al. 2014                         |
|                             |     |           |           | DEL  | Coe et al. 2014                         |
| <b>15q25.2</b>              | 15  | 83219735  | 85722039  | DEL  | Coe et al. 2014                         |
|                             |     |           |           | DUP  | Coe et al. 2014                         |
| <b><i>CREBBP</i></b>        | 16  | 3775056   | 3930121   | Gene | Satterstrom et al. 2020                 |
| <b>16p13.11</b>             | 16  | 15511655  | 16293689  | DEL  | Sanders et al. 2019                     |
|                             |     |           |           | DUP  | Sanders et al. 2019                     |
| <b>16p12.1</b>              | 16  | 21950135  | 22431889  | DEL  | Coe et al. 2014                         |
|                             |     |           |           | DUP  | Coe et al. 2014                         |

|                                |    |          |          |      |                         |
|--------------------------------|----|----------|----------|------|-------------------------|
| <b>16p11.2 distal</b>          | 16 | 28823196 | 29046783 | DEL  | Sanders et al. 2019     |
|                                |    |          |          | DUP  | Sanders et al. 2019     |
| <b>16p11.2 distal+proximal</b> | 16 | 28823196 | 30200773 | DEL  | Coe et al. 2014         |
|                                |    |          |          | DUP  | Coe et al. 2014         |
| <b>16p11.2 proximal</b>        | 16 | 29650840 | 30200773 | DEL  | Sanders et al. 2019     |
|                                |    |          |          | DUP  | Sanders et al. 2019     |
| <b>16p11.2p12.1</b>            | 16 | 21596415 | 28347808 | DEL  | Coe et al. 2014         |
|                                |    |          |          | DUP  | Coe et al. 2014         |
| <b>YWHAE</b>                   | 17 | 1247834  | 1303556  | Gene | Coe et al. 2014         |
| <b>PAFAH1B1</b>                | 17 | 2496923  | 2588909  | Gene | Coe et al. 2014         |
| <b>17p12</b>                   | 17 | 14141387 | 15426961 | DEL  | Stefansson et al. 2014  |
|                                |    |          |          | DUP  | Stefansson et al. 2014  |
| <b>17p11.2</b>                 | 17 | 16812771 | 20211017 | DEL  | Sanders et al. 2019     |
|                                |    |          |          | DUP  | Sanders et al. 2019     |
| <b>17q11.2 NF1</b>             | 17 | 29107491 | 30265075 | DEL  | Coe et al. 2014         |
|                                |    |          |          | DUP  | Coe et al. 2014         |
| <b>17q12</b>                   | 17 | 34815904 | 36217432 | DEL  | Sanders et al. 2019     |
|                                |    |          |          | DUP  | Sanders et al. 2019     |
| <b>17q21.31</b>                | 17 | 43705356 | 44164691 | DEL  | Coe et al. 2014         |
|                                |    |          |          | DUP  | Coe et al. 2014         |
| <b>17q23.1q23.2</b>            | 17 | 58302389 | 60289141 | DEL  | Coe et al. 2014         |
|                                |    |          |          | DUP  | Coe et al. 2014         |
| <b>22q11.2 distal</b>          | 22 | 21920127 | 23653646 | DEL  | Coe et al. 2014         |
|                                |    |          |          | DUP  | Coe et al. 2014         |
| <b>22q11.2 proximal</b>        | 22 | 19037332 | 21466726 | DEL  | Sanders et al. 2019     |
|                                |    |          |          | DUP  | Sanders et al. 2019     |
| <b>SHANK3</b>                  | 22 | 51113070 | 51171640 | Gene | Satterstrom et al. 2020 |

Legend: List of recurrent loci and genes previously associated with neuropsychiatric disorders.<sup>1-4</sup> Coordinates are presented in hg19 (Homo sapiens (human) genome assembly GRCh37) from Genome Reference Consortium; CHR: chromosome; BP: break points; WBS: William-Beuren syndrome.

**TABLE S2. List of the recurrent neurodevelopmental or neuropsychiatric-associated CNVs identified in the EOP sample**

| Locus            | Start (Hg19) | Stop (Hg19) | Type | Genes totally encompassed                                                                                                                                                                                                                      | Other CNV <sub>≥50Kb</sub> | Sex    | Age of onset for EOP | ASD | ID  |
|------------------|--------------|-------------|------|------------------------------------------------------------------------------------------------------------------------------------------------------------------------------------------------------------------------------------------------|----------------------------|--------|----------------------|-----|-----|
| 1q21.1 distal    | 146618800    | 147820000   | DUP  | PRKAB2, GJA5, FMO5, CHD1L, ACP6, NBPf24, BCL9, GJA8, GPR89B, AC242628.1                                                                                                                                                                        | no                         | Male   | 13                   | no  | no  |
| 1q21.1 distal    | 146618988    | 147825855   | DUP  | PRKAB2, ACP6, FMO5, BCL9, AC242628.1, CHD1L, GJA5, GPR89B, NBPf24, GJA8                                                                                                                                                                        | no                         | Male   | 4                    | no  | no  |
| 1q21.1 distal    | 146535353    | 147857135   | DUP  | GPR89B, GJA8, ACP6, AC242628.1, BCL9, PRKAB2, NBPf24, GJA5, CHD1L, FMO5                                                                                                                                                                        | no                         | Male   | 15                   | yes | no  |
| 15q11.2 BP1-BP2  | 22762571     | 23080867    | DEL  | CYFIP1, NIPA2, TUBGCP5                                                                                                                                                                                                                         | no                         | Male   | 5                    | no  | no  |
| 16p11.2 proximal | 29592843     | 30264892    | DEL  | PAGR1, SEZ6L2, SLX1A, TBX6, MVP, TAOK2, BOLA2B, AC093512.2, HIRIP3, SULT1A3, YPEL3, MAZ, CDIPT, PRRT2, INO80E, C16orf54, SPN, NPIPB13, KIF22, C16orf92, CORO1A, ALDOA, TMEM219, ASPHD1, QPRT, KCTD13, ZG16, DOC2A, PPP4C, MAPK3, GDPD3, TLCD3B | no                         | Male   | 4                    | yes | yes |
| 16p11.2 proximal | 29652999     | 30357820    | DUP  | MVP, C16orf92, MAPK3, SLX1A, KCTD13, ZG16, C16orf54, AC093512.2, TBX6, CORO1A, PAGR1, CDIPT, PRRT2, ASPHD1, PPP4C, ALDOA, KIF22, YPEL3, SULT1A3, TAOK2, TMEM219, GDPD3, QPRT, MAZ, BOLA2B, SEZ6L2, NPIPB13, HIRIP3, SPN, TLCD3B, INO80E, DOC2A | no                         | Male   | 13                   | yes | no  |
| 16p13.11         | 14968855     | 16267250    | DEL  | MARF1, BMERB1, RRN3, ABCC1, NTAN1, CEP20, PDXDC1, MYH11, NDE1, MPV17L, NPIPA5, NPIPA1                                                                                                                                                          | yes (2)                    | Male   | 12                   | no  | yes |
| 16p13.11         | 14906734     | 16388596    | DEL  | RRN3, MPV17L, BMERB1, NOMO1, ABCC1, ABCC6, NPIPA5, NDE1, NTAN1, CEP20, MYH11, NPIPA1, PDXDC1, MARF1                                                                                                                                            | no                         | Female | 6                    | yes | --  |
| 16p13.11         | 14897788     | 16293305    | DUP  | MPV17L, MARF1, BMERB1, NPIPA5, CEP20, RRN3, NPIPA1, MYH11, NTAN1, NDE1, NOMO1, ABCC1, PDXDC1                                                                                                                                                   | no                         | Female | 13                   | no  | no  |
| 16p13.11         | 14897761     | 16276117    | DUP  | NTAN1, PDXDC1, NPIPA1, RRN3, MPV17L, MYH11, CEP20, NOMO1, ABCC1, NDE1, MARF1, BMERB1, NPIPA5                                                                                                                                                   | no                         | Female | 4                    | yes | yes |
| 22q11.2 proximal | 18894835     | 20311763    | DEL  | ARVCF, PRODH, TANGO2, COMT, DGCR6L, DGCR8, ZDHHC8, TBX1, CLDN5, CLTCL1, SEPTIN5, MRPL40, RANBP1, HIRA, RTN4R, GSC2, UFD1, TXNRD2, DGCR2, CDC45, TRMT2A, SLC25A1, GP1BB, RTL10, ESS2, C22orf39, GNB1L, CCDC188, TSSK2                           | yes (1)                    | Male   | 13                   | no  | yes |

Legend: A CNV was considered as recurrent only if it overlapped at more than 40% with a loci previously associated with neuropsychiatric disorders.<sup>1-4</sup>

Coordinates are based on Hg19 map of the genome (Homo sapiens (human) genome assembly GRCh37 from Genome Reference Consortium). CNV: Copy number variant; DEL: deletion; DUP: duplication; ASD: autism spectrum disorder; ID: intellectual disability; --: unknown.

**TABLE S3. Enrichment of individual neurodevelopmental or neuropsychiatric-associated CNVs in EOP relative to ASD and controls**

| Cohort<br>(Total N in<br>cohort) | EOP<br>(n=137) |     | ASD<br>(n=5,540) |     | Controls<br>(n=16,504) |     | EOP vs. Controls<br>OR [95%CI] p-value                |                                                       | EOP vs. ASD<br>OR [95%CI] p-value |                                |
|----------------------------------|----------------|-----|------------------|-----|------------------------|-----|-------------------------------------------------------|-------------------------------------------------------|-----------------------------------|--------------------------------|
|                                  | DEL            | DUP | DEL              | DUP | DEL                    | DUP | DEL                                                   | DUP                                                   | DEL                               | DUP                            |
| <b>1q21.1</b>                    | --             | 3   | --               | 19  | --                     | 7   | --                                                    | <b>52.60</b><br>[8.69-233.00]<br>p=6×10 <sup>-5</sup> | --                                | 6.50<br>[1.22-22.47]<br>p=0.01 |
| <b>15q11.2 BP1-<br/>BP2</b>      | 1              | --  | 16               | --  | 70                     | --  | n.s.                                                  | --                                                    | n.s.                              | --                             |
| <b>16p11.2<br/>proximal</b>      | 1              | 1   | 11               | 14  | 5                      | 6   | 24.23<br>[0.51-218.14]<br>p=0.05                      | n.s.                                                  | n.s.                              | n.s.                           |
| <b>16p13.11</b>                  | 2              | 2   | 7                | 12  | 8                      | 31  | <b>30.51</b><br>[3.13-155.48]<br>p=3×10 <sup>-3</sup> | 7.87<br>[0.90-31.39]<br>p=0.03                        | 11.69<br>[1.17-62.20]<br>p=0.02   | 6.82<br>[0.73-31.10]<br>p=0.04 |
| <b>22q11.2<br/>proximal</b>      | 1              | --  | 1                | --  | 0                      | --  | ∞<br>[3.09-inf]<br>p=8×10 <sup>-3</sup>               | --                                                    | 40.54<br>[0.52-inf]<br>p=0.05     | --                             |

Legend: Odds ratios are computed using Fisher's exact test for deletions and duplications. Significant p-values after FDR correction are in bold ( $\leq 0.009$  when comparing EOP to controls and  $\leq 0.005$  when comparing EOP to ASD). EOP: early-onset psychosis; Controls: unselected population; ASD: autism spectrum disorder; DEL: deletion; DUP: duplication; OR: Odds ratio; 95% CI: 95% confidence intervals; --: not applicable; n.s.: non-significant

**TABLE S4. Phenotypes of 1q21 duplication patients in comparison to Rosenfeld, et al. 2012<sup>5</sup>**

| Feature                                     | Distal (BP3–BP4) duplications<br>(Rosenfeld, et al.) | 1440-01 | 1464-01                        | 1468-01 |
|---------------------------------------------|------------------------------------------------------|---------|--------------------------------|---------|
| Short stature                               | 9.5%                                                 | -       | -                              | -       |
| Failure to thrive/feeding problems          | 20%                                                  | ?       | ?                              | ?       |
| Microcephaly                                | 8.7%                                                 | -       | -                              | -       |
| Macrocephaly                                | 43.5%                                                | -       | -                              | -       |
| Developmental delay/intellectual disability | 77.8%                                                | -       | +                              | -       |
| Hypotonia                                   | 14.8%                                                | -       | -                              | -       |
| Seizures                                    | 17.9%                                                | -       | -                              | -       |
| Autistic features                           | 41.2%                                                | -       | -                              | +       |
| Other behavioral problems                   | 4%                                                   | +       | +                              | +       |
| Hearing loss                                | 0%                                                   | -       | -                              | -       |
| Brain abnormalities                         | 75%                                                  | -       | (left temporal slowing on EEG) | -       |
| Dysmorphic features                         | 51.9%                                                | -       | -                              | -       |
| Cataracts                                   | 0%                                                   | -       | -                              | -       |
| Other ophthalmologic abnormalities          | 14.8%                                                | -       | -                              | -       |
| Craniosynostosis                            | 0%                                                   | -       | -                              | -       |
| Skeletal limb abnormalities                 | 0%                                                   | -       | -                              | -       |
| Other skeletal anomalies                    | 7.4%                                                 | -       | -                              | -       |
| Clinodactyly                                | 3.7%                                                 | -       | -                              | -       |
| Ligamentous laxity                          | 3.7%                                                 | -       | -                              | -       |
| Cardiac anomalies                           | 28.6%                                                | -       | -                              | -       |
| Lung abnormalities                          | 0%                                                   | -       | -                              | -       |
| Renal anomalies                             | 3.7%                                                 | -       | -                              | -       |
| Genital anomalies                           | 11.1%                                                | -       | -                              | -       |
| Blood disorders                             | 0%                                                   | -       | -                              | -       |

## REFERENCES

- 1 Coe BP, Witherspoon K, Rosenfeld JA, et al. Refining analyses of copy number variation identifies specific genes associated with developmental delay. *Nat Genet* 2014; **46**: 1063–71.
- 2 Stefansson H, Meyer-Lindenberg A, Steinberg S, et al. CNVs conferring risk of autism or schizophrenia affect cognition in controls. *Nature* 2014; **505**: 361–6.
- 3 Sanders SJ, Sahin M, Hostyk J, et al. A framework for the investigation of rare genetic disorders in neuropsychiatry. *Nat Med* 2019; published online Sept 23. DOI:10.1038/s41591-019-0581-5.
- 4 Satterstrom FK, Kosmicki JA, Wang J, et al. Large-Scale Exome Sequencing Study Implicates Both Developmental and Functional Changes in the Neurobiology of Autism. *Cell* 2020; **180**: 568-584.e23.
- 5 Rosenfeld JA, Traylor RN, Schaefer GB, et al. Proximal microdeletions and microduplications of 1q21.1 contribute to variable abnormal phenotypes. *Eur J Hum Genet* 2012; **20**: 754–61.
